# Supplementary material
Source: PubMed Central journal article supplement (PMC4205665)
Supplement: pnas.201410431SI.pdf [file pnas.201410431SI.pdf]

# Supporting Information

Kazmier et al. 10.1073/pnas.1410431111

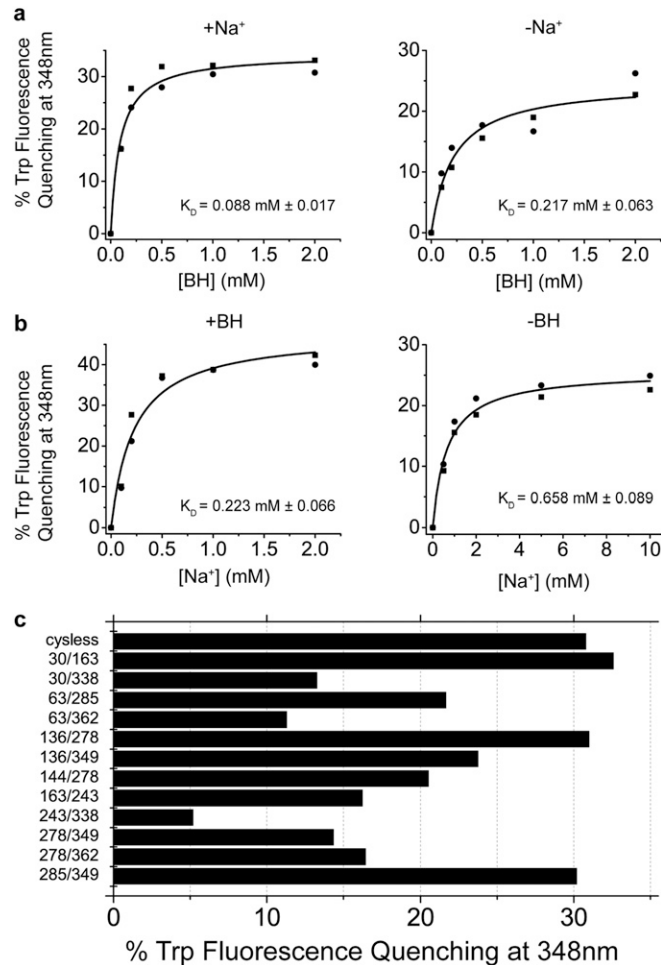

**Fig. S1.** Na<sup>+</sup> and benzyl-hydantoin (BH) bind to cysless Mhp1 and its spin-labeled mutants. Trp fluorescence emission was measured at 348 nm. Na<sup>+</sup> and BH binding leads to reduction in signal intensity, which is reported as a percentage quenching of the signal in the absence of ligands. (A) BH-binding isotherms determined from Trp fluorescence quenching were generated for cysless Mhp1 in the presence and absence of saturating concentrations of Na<sup>+</sup> for increasing concentrations of BH. The results demonstrate that the substitution of the native cysteines does not compromise substrate binding or abrogate the increase in substrate affinity in the presence of Na<sup>+</sup>. (B) Na<sup>+</sup> binding isotherms were generated for cysless Mhp1 in the presence and absence of saturating concentrations of BH for increasing concentrations of Na<sup>+</sup>. The results show that cysless Mhp1 binds Na<sup>+</sup> in the presence and absence of BH. The data in A and B represent two distinct measurements. The solid line is a nonlinear least-squares fit to the average. (C) Trp fluorescence quenching for spin-labeled pairs demonstrates BH binding in the presence of saturating levels of Na<sup>+</sup> and BH.
